# Supplementary material for: CryoET of β-amyloid and tau within postmortem Alzheimer’s disease brain
Source: PubMed Central journal article supplement (PMC11269202; doi:10.1038/s41586-024-07680-x), 2024-07-10

---

**Supplementary information**

---

**CryoET of  $\beta$ -amyloid and tau within  
postmortem Alzheimer's disease brain**

---

In the format provided by the  
authors and unedited

Related to Fig. 1b

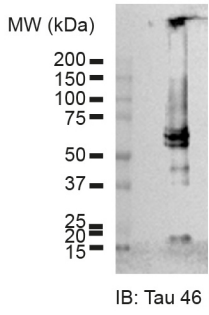

Related to ED Fig. 1b

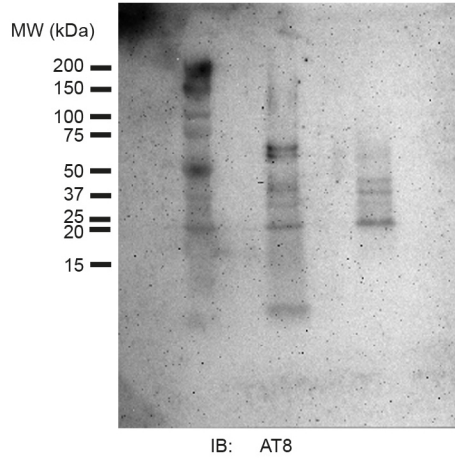

Related to ED Fig. 1b

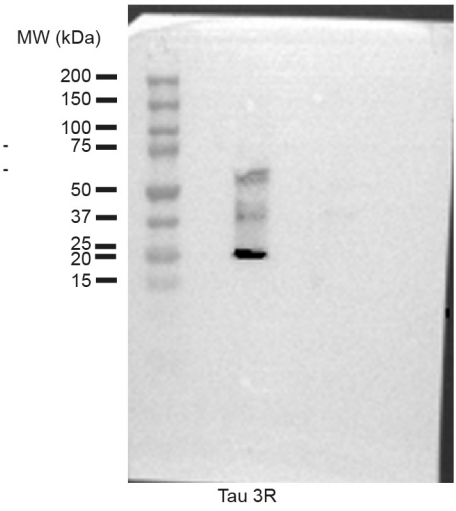

Related to ED Fig. 1b

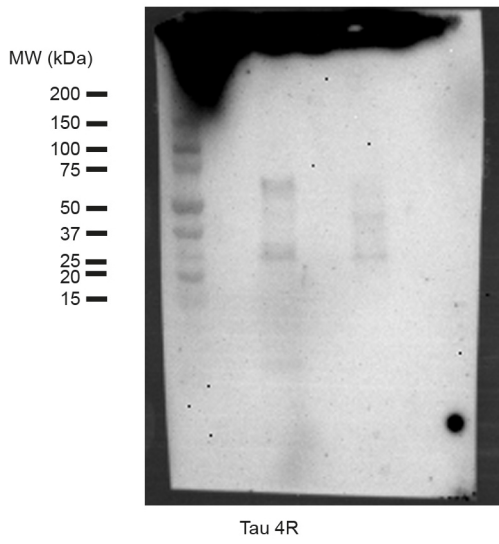

Related to ED Fig. 1b

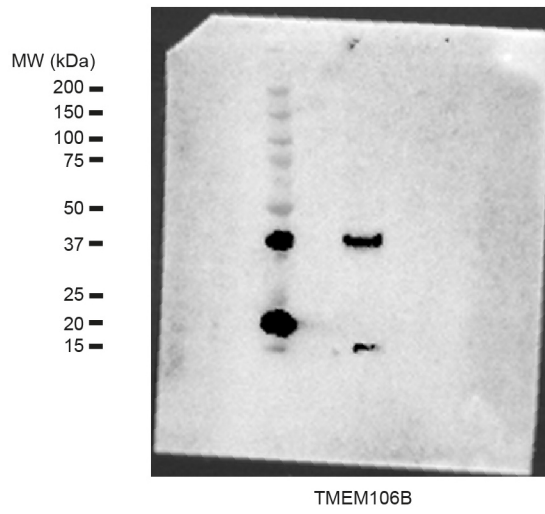

Supplement: 41586_2024_7680_MOESM1_ESM.pdf [file 41586_2024_7680_MOESM1_ESM.pdf]
