# Supplementary material for: CryoET of β-amyloid and tau within postmortem Alzheimer’s disease brain
Source: PubMed Central journal article supplement (PMC11269202; doi:10.1038/s41586-024-07680-x), 2024-07-10
Supplement: 41586_2024_7680_MOESM11_ESM.pdf [file 41586_2024_7680_MOESM11_ESM.pdf]

## Data collection and processing

|                                                     |              |
|-----------------------------------------------------|--------------|
| Magnification                                       | 96,000       |
| Voltage (kV)                                        | 300          |
| Detector                                            | Falcon4      |
| Pixel size (Å)                                      | 0.83         |
| Electron exposure (e <sup>-</sup> /Å <sup>2</sup> ) | 44           |
| Exposure rate (e <sup>-</sup> /pixel/s)             | 7.6          |
| Nominal defocus range (μm)                          | -1.5 to -2.7 |
| Movies collected                                    | 10,860       |
| Initial particle images (no.)                       | 321,041      |
| Final particle images (no.)                         | 40,180       |
| Symmetry imposed                                    | C1           |
| Map resolution (Å)                                  | 3.0          |
| FSC threshold                                       | 0.143        |
| Map resolution range (Å)                            | 2.8-4.5      |
| Helical parameters                                  |              |
| Helical twist (°)                                   | 179.44       |
| Helical rise (Å)                                    | 2.405        |
| Crossover (nm)                                      | ~80          |

## Refinement\*

|                                                  |                 |
|--------------------------------------------------|-----------------|
| Initial model used (PDB code)                    | 5O3L            |
| Map sharpening <i>B</i> factor (Å <sup>2</sup> ) | -57             |
| Model resolution (Å)                             | 2.9             |
| FSC threshold                                    | 0.5             |
| Model to map correlation                         | 0.89            |
| C $\alpha$ R.M.S.D to initial model (Å)          | 0.63 (70 atoms) |

---
